# Supplementary material
Source: MDPI journal article supplement (https://www.mdpi.com/2077-1312/3/2/216)
Supplement: s1 [file s1]

Supplementary Information

**Table S1.** The chemical and physical conditions at the start and at the end of each experiment for *Acropora hyacinthus* (Lyudao),
*Favites abdita*, *Acropora hyacinthus* (Kochi) and *Platygyra contorta*. Values are mean ± standard deviation. “tank” means “measured in 5L beaker”, “log5 vials” means “measured in 50 mL Falcon tube containing 105 sperm mL−1”, “control vials” means “measured in 50 mL Falcon tube without sperm and eggs (control)”.

| ***Acropora hyacynthus*** **(Lyudao)** | | | | | | | ***Acropora hyacynthus* (Kochi)** | | | | | | | | | |
| --- | --- | --- | --- | --- | --- | --- | --- | --- | --- | --- | --- | --- | --- | --- | --- | --- |
|  | **Salinity** | **T** | | **TA** | **pH** | **CO2** |  | **Salinity** | **T** | **TA** | **pH** | | | **CO2** | | |
|  | ppt | °C | | μmol·kg−1 | (NBS) | μatm |  | ppt | °C | μmol·kg−1 | (NBS) | | | μatm | | |
| **Start of Experiment** |  | | | | | | **Start of Experiment** |  |  |  |  |  |  |  |  |  |
| **tank** | (*n* = 1) | | | | | | **Control Vials** | (*n* = 5) | | | | | | | | |
| Ambient CO2 × 27°C | 33.0 | 27.0 | | 2250.35 | 8.18 | 403.95 | Ambient CO2 × 27 °C | 33.6 | 26.84 ± *0.20* | 2219.39 | 8.11 ± *0.01* | | | 478 ± *14* | | |
| High CO2 × 27°C | 33.0 | 27.0 | | 2250.35 | 7.87 | 933.75 | High CO2 × 27 °C | 33.6 | 26.78 ± *0.20* | 2219.39 | 7.82 ± *0.02* | | | 1034 ± *47* | | |
| Ambient CO2 × 31°C | 33.0 | 31.0 | | 2250.35 | 8.15 | 446.64 | Ambient CO2 × 31 °C | 33.6 | 30.76 ± *0.20* | 2219.39 | 8.08 ± *0.01* | | | 526 ± *17* | | |
| High CO2 × 31°C | 33.0 | 31.0 | | 2250.35 | 7.91 | 863.44 | High CO2 × 31 °C | 33.6 | 30.76 ± *0.20* | 2219.39 | 7.87 ± *0.01* | | | 939 ± *31* | | |
| **End of Experiment** |  | | | | | | **End of Experiment** |  |  |  |  |  |  |  |  |  |
| **log5 Vials** | (*n* = 1) | | | | | | **log5 Vials** | (*n* = 5) | | | | | | | | |
| Ambient CO2 × 27 °C | 32.8 | 27.1 | | 2270.45 | - | - | Ambient CO2 × 27 °C | 33.4 | 26.86 ± *0.20* | 2222.32 | 8.04 ± *0.01* | | | 590 ± *9* | | |
| High CO2 × 27 °C | 32.8 | 26.9 | | 2280.11 | 7.73 | 1354.77 | High CO2 × 27 °C | 33.5 | 26.86 ± *0.20* | 2297.64 | 7.76 ± *0.02* | | | 1245 ± *48* | | |
| Ambient CO2 × 31 °C | 33.1 | 30.5 | | 2264.63 | 7.96 | 757.47 | Ambient CO2 × 31 °C | 33.5 | 30.85 ± *0.20* | 2225.28 | 8.00 ± *0.00* | | | 662 ± *8* | | |
| High CO2 × 31 °C | 32.8 | 30.5 | | 2262.80 | 7.84 | 1042.26 | High CO2 × 31 °C | 33.6 | 30.84 ± *0.20* | 2225.69 | 7.81 ± *0.01* | | | 1114 ± *26* | | |
|  |  | |  |  |  |  | **Control Vials** | (*n* = 5) | | | | | | | | |
|  |  | |  |  |  |  | Ambient CO2 × 27 °C | 33.5 | 26.88 ± *0.20* | 2221.73 | 8.05 ± *0.01* | | | 562 ± *8* | | |
|  |  | |  |  |  |  | High CO2 × 27 °C | 33.4 | 26.86 ± *0.20* | 2218.14 | 7.79 ± *0.01* | | | 1125 ± *40* | | |
|  |  | |  |  |  |  | Ambient CO2 × 31 °C | 33.5 | 30.80 ± *0.20* | 2225.33 | 8.04 ± *0.01* | | | 590 ± *9* | | |
|  |  | |  |  |  |  | High CO2 × 31 °C | 33.5 | 30.78 ± *0.20* | 2223.13 | 7.85 ± *0.02* | | | 992 ± *41* | | |

**Table S1.** *Cont.*

| ***Acropora hyacynthus*** **(Lyudao)** | | | | | | ***Acropora hyacynthus* (Kochi)** | | | | | | | | |
| --- | --- | --- | --- | --- | --- | --- | --- | --- | --- | --- | --- | --- | --- | --- |
| ***Favites abdita*** | | | | | | ***Platygyra contorta*** | | | | | | | | |
|  | **Salinity** | **T** | **TA** | **pH** | **CO2** |  | **Salinity** | | **T** | | | **TA** | **pH** | **CO2** |
|  | **ppt** | **°C** | **μmol·kg−1** | **(NBS)** | **μatm** |  | ***ppt*** | | ***°C*** | | | **μmol·kg−1** | ***(NBS)*** | ***μatm*** |
| **Start of Experiment** |  | | | | | **Start of Experiment** | |  |  |  |  |  |  |  |
| **Tank** | (*n* = 1) | | | | | **Control Vials** | | (*n* = 5) | | | | | | |
| Ambient CO2 × 27 °C | 32.9 | 27.0 | 2258.15 | 8.15 | 441.71 | Ambient CO2 × 27 °C | 32.7 | | 26.9 ± *0.20* | | | 2181.58 | 8.06 ± *0.00* | 550 ± *7* |
| High CO2 × 27 °C | 32.9 | 27.0 | 2258.15 | 7.76 | 1243.44 | High CO2 × 27 °C | 32.7 | | 26.9 ± *0.20* | | | 2181.58 | 7.82 ± *0.01* | 1021 ± *14* |
| Ambient CO2 × 31 °C | 32.9 | 31.0 | 2258.15 | 8.15 | 448.83 | Ambient CO2 × 31 °C | 32.7 | | 30.8 ± *0.20* | | | 2181.58 | 8.06 ± *0.00* | 558 ± *0* |
| High CO2 × 31 °C | 32.9 | 31.0 | 2258.15 | 7.93 | 822.49 | High CO2 × 31 °C | 32.7 | | 30.7 ± *0.20* | | | 2181.58 | 7.84 ± *0.00* | 1001 ± *12* |
| **End of Experiment** |  | | | | | **End of Experiment** | |  |  |  |  |  |  |  |
| **log5 vials** | (*n* = 1) | | | | | **log5 vials** | | (*n* = 5) | | | | | | |
| Ambient CO2 × 27 °C | 33.3 | 26.9 | 2268.16 | 8.03 | 614.07 | Ambient CO2 × 27 °C | 32.9 | | 26.89 ± *0.20* | | | 2196.04 | 8.00 ± *0.00* | 647 ± *0* |
| High CO2 × 27 °C | 33.2 | 26.9 | 2260.45 | 7.77 | 1209.28 | High CO2 × 27 °C | 32.9 | | 26.89 ± *0.20* | | | 2192.50 | 7.79 ± *0.01* | 1106 ± *32* |
| Ambient CO2 × 31 °C | 33.6 | 30.8 | 2276.27 | 8.10 | 516.48 | Ambient CO2 × 31 °C | 33.0 | | 30.78 ± *0.20* | | | 2189.03 | 8.00 ± *0.00* | 662 ± *8* |
| High CO2 × 31 °C | 33.4 | 30.9 | 2242.58 | 7.80 | 1142.34 | High CO2 × 31 °C | 32.9 | | 30.79 ± *0.20* | | | 2187.75 | 7.82 ± *0.01* | 1073 ± *16* |
| **Control Vials** | (*n* = 1) | | | | | **Control Vials** | | (*n* = 5) | | | | | | |
| Ambient CO2 × 27 °C | 33.2 | 27.0 | 2265.15 | - | - | Ambient CO2 × 27 °C | 32.9 | | 26.89 ± *0.20* | | | 2271.64 | 8.03 ± *0.01* | 618 ± *12* |
| High CO2 × 27 °C | 33.2 | 26.9 | 2257.55 | 7.78 | 1177.37 | High CO2 × 27 °C | 32.8 | | 26.89 ± *0.20* | | | 2196.27 | 7.82 ± *0.01* | 1037 ± *27* |
| Ambient CO2 × 31 °C | 33.4 | 30.9 | 2272.58 | 8.10 | 517.06 | Ambient CO2 × 31 °C | 32.9 | | 30.80 ± *0.20* | | | 2182.03 | 8.03 ± *0.01* | 599 ± *9* |
| High CO2 × 31 °C | 33.3 | 30.9 | 2265.54 | 7.83 | 1068.88 | High CO2 × 31 °C | 32.8 | | 30.76 ± *0.20* | | | 2179.77 | 7.81 ± *0.01* | 1086 ± *20* |

**Table S2.** Table showing the results of the logistic regression using GLM for the effect of temperature and CO2 on fertilization rate, abnormal development and early developmental success of the different coral species. Df = degrees of freedom, Dev = deviance, Resid.
Df = residual degrees of freedom, Resid. Dev = residual deviance, *F* = *F*-statistic, *p* = *p*-value. NS = not significant, * means *p* < 0.05, ** means <0.01 and *** means <0.001.
(*n* = 5 per species).

|  | **Df** | **Dev** | **Resid. Df.** | **Resid. Dev** | ***F*** | ***p*** |  |
| --- | --- | --- | --- | --- | --- | --- | --- |
| ***Acropora hyacinthus* (Lyudao)** | |  |  |  |  |  |  |
| **Fertilization success** |  |  |  |  |  |  |  |
| NULL |  |  | 19 | 446.1 |  |  |  |
| CO2 | 1 | 1 | 18 | 445.1 | 0.5 | 0.49 | NS |
| T | 1 | 356.4 | 17 | 88.7 | 172.3 | 5.60 × 10−10 | *** |
| CO2:T | 1 | 55.2 | 16 | 33.5 | 26.7 | 9.40 × 10−5 | *** |
| **Abnormal Development** |  |  |  |  |  |  |  |
| NULL |  |  | 19 | 397.4 |  |  |  |
| CO2 | 1 | 25.5 | 18 | 371.9 | 13.4 | 2.10 × 10−3 | ** |
| T | 1 | 333.2 | 17 | 38.8 | 175 | 5.00 × 10−10 | *** |
| CO2:T | 1 | 2.7 | 16 | 36.1 | 1.4 | 0.25 | NS |
| **Early Developmental Success** | |  |  |  |  |  |  |
| NULL |  |  | 19 | 749.6 |  |  |  |
| CO2 | 1 | 3.3 | 18 | 746.3 | 1.8 | 0.19 | NS |
| T | 1 | 690.2 | 17 | 56.1 | 384.3 | 1.30 × 10−12 | *** |
| CO2:T | 1 | 27.8 | 16 | 28.3 | 15.5 | 1.20 × 10−3 | ** |
| ***Favites abdita*** |  |  |  |  |  |  |  |
| **Fertilization Success** |  |  |  |  |  |  |  |
| NULL |  |  | 9 | 7.2 |  |  |  |
| CO2 | 1 | 0 | 8 | 7.1 | 0 | 0.86 | NS |
| **Abnormal Development** |  |  |  |  |  |  |  |
| NULL |  |  | 9 | 14.4 |  |  |  |
| CO2 | 1 | 5 | 8 | 9.4 | 5.3 | 0.05 | NS |
| **Early Developmental Success** | |  |  |  |  |  |  |
| NULL |  |  | 9 | 23.4 |  |  |  |
| CO2 | 1 | 0.6 | 8 | 22.8 | 0.2 | 0.66 | NS |
|  |  |  |  |  |  |  |  |
| ***Acropora hyacinthus* (Kochi)** | |  |  |  |  |  |  |
| **Fertilization success** |  |  |  |  |  |  |  |
| NULL |  |  | 19 | 102.8 |  |  |  |
| CO2 | 1 | 72.4 | 18 | 30.4 | 93.2 | 4.50 × 10−8 | *** |
| T | 1 | 12.7 | 17 | 17.7 | 16.4 | 9.30 × 10−4 | *** |
| CO2:T | 1 | 3.2 | 16 | 14.5 | 4.1 | 0.06 | NS |
| **Abnormal Development** |  |  |  |  |  |  |  |
| NULL |  |  | 19 | 2889.8 |  |  |  |
| CO2 | 1 | 0.5 | 18 | 2889.4 | 0.1 | 0.72 | NS |
| T | 1 | 2803.9 | 17 | 85.4 | 827.2 | 3.30 × 10−15 | *** |
| CO2:T | 1 | 36.3 | 16 | 49.1 | 10.7 | 4.80 × 10−3 | ** |

**Table S2.** *Cont.*

|  | **Df** | **Dev** | **Resid. Df.** | **Resid. Dev** | ***F*** | ***p*** |  |
| --- | --- | --- | --- | --- | --- | --- | --- |
| **Early Developmental Success** | |  |  |  |  |  |  |
| NULL |  |  | 19 | 2677.8 |  |  |  |
| CO2 | 1 | 4.8 | 18 | 2673.1 | 1.5 | 0.24 | NS |
| T | 1 | 2610.5 | 17 | 62.6 | 832.9 | 3.20 × 10−15 | *** |
| CO2:T | 1 | 17.4 | 16 | 45.1 | 5.6 | 0.03 | * |
| ***Platygyra contorta*** |  |  |  |  |  |  |  |
| **Fertilization Success** |  |  |  |  |  |  |  |
| NULL |  |  | 19 | 389.2 |  |  |  |
| CO2 | 1 | 28.3 | 18 | 351.9 | 20.2 | 3.70 × 10−4 | *** |
| T | 1 | 328.5 | 17 | 23.4 | 234.5 | 5.60 × 10−11 | *** |
| CO2:T | 1 | 0.2 | 16 | 23.2 | 0.1 | 0.7 | NS |
| **Abnormal Development** |  |  |  |  |  |  |  |
| NULL |  |  | 19 | 2463.2 |  |  |  |
| CO2 | 1 | 681.7 | 18 | 1781.5 | 1522.1 | 2.20 × 10−16 | *** |
| T | 1 | 1677.9 | 17 | 103.6 | 3746.7 | 2.20 × 10−16 | *** |
| CO2:T | 1 | 96.4 | 16 | 7.2 | 215.3 | 1.10 × 10−10 | *** |
| **Early Developmental Success** | |  |  |  |  |  |  |
| NULL |  |  | 19 | 2722.6 |  |  |  |
| CO2 | 1 | 622.6 | 18 | 2100.1 | 968 | 9.70 × 10−16 | *** |
| T | 1 | 1932 | 17 | 168.1 | 3003.8 | 2.20 × 10−16 | *** |
| CO2:T | 1 | 157.2 | 16 | 10.9 | 244.4 | 4.10 × 10−11 | *** |

**Table S3.** Table showing the results of the GLM for the effect of latitudinal location on fertilization rate, abnormal development and early developmental success of *A. hyacinthus* in Lyudao and Kochi. Df = degrees of freedom, Resid. Df = residual degrees of freedom, Resid. Dev = residual deviance, *F* = *F*-statistic, *p* = p-value. NS = not significant, * means
*p* < 0.05, ** means <0.01 and *** means <0.001. (*n* = 5 per location)

|  | ***Acropora hyacinthus* (Lyudao *vs.* Kochi)** | | | | | | |
| --- | --- | --- | --- | --- | --- | --- | --- |
|  | **Df** | **Dev** | **Resid. Df.** | **Resid. Dev** | ***F*** | ***p*** |  |
| **Fertilization success** |  |  |  |  |  |  |  |
| NULL |  |  | 39 | 3863.7 |  |  |  |
| location | 1 | 3314.8 | 38 | 548.9 | 2329.5 | 2.20 × 10−16 | *** |
| T | 1 | 243.2 | 37 | 305.7 | 170.9 | 2.20 × 10−14 | *** |
| CO2 | 1 | 24 | 36 | 281.8 | 16.9 | 2.60 × 10−4 | *** |
| location:T | 1 | 126.1 | 35 | 155.7 | 88.6 | 9.80 × 10−11 | *** |
| location:CO2 | 1 | 49.3 | 34 | 106.4 | 34.7 | 1.50 × 10−6 | *** |
| T:CO2 | 1 | 40.3 | 33 | 66.1 | 28.3 | 7.80 × 10−6 | *** |
| location:T:CO2 | 1 | 18.1 | 32 | 48 | 12.7 | 1.20 × 10−3 | ** |

**Table S3.** *Cont.*

|  | ***Acropora hyacinthus* (Lyudao *vs.* Kochi)** | | | | | | |
| --- | --- | --- | --- | --- | --- | --- | --- |
|  | **Df** | **Dev** | **Resid. Df.** | **Resid. Dev** | ***F*** | ***p*** |  |
| **Abnormal development** |  |  |  |  |  |  |  |
| NULL |  |  | 39 | 3597.9 |  |  |  |
| location | 1 | 310.7 | 38 | 3287.2 | 117.4 | 3.10 × 10−12 | *** |
| T | 1 | 3105.3 | 37 | 182 | 1173.2 | 2.20 × 10−16 | *** |
| CO2 | 1 | 2.9 | 36 | 179 | 1.1 | 0.3 | NS |
| location:T | 1 | 54.5 | 35 | 124.5 | 20.6 | 7.50 × 10−5 | *** |
| location:CO2 | 1 | 0.3 | 34 | 124.2 | 0.1 | 0.75 | NS |
| T:CO2 | 1 | 33.6 | 33 | 90.6 | 12.7 | 1.20 × 10−3 | ** |
| location:T:CO2 | 1 | 5.4 | 32 | 85.2 | 2 | 0.16 | NS |
| **Early Developmental Success** | |  |  |  |  |  |  |
| NULL |  |  | 39 | 3720.6 |  |  |  |
| location | 1 | 293.2 | 38 | 3427.4 | 118.9 | 2.60 × 10−12 | *** |
| T | 1 | 3179.3 | 37 | 248.1 | 1289.7 | 2.20 × 10−16 | *** |
| CO2 | 1 | 4.2 | 36 | 243.9 | 1.7 | 0.2 | NS |
| location:T | 1 | 106.5 | 35 | 137.4 | 43.2 | 2.10 × 10−7 | *** |
| location:CO2 | 1 | 18.8 | 34 | 118.6 | 7.6 | 0.01 | ** |
| T:CO2 | 1 | 45.1 | 33 | 73.5 | 18.3 | 1.60 × 10−4 | *** |
| location:T:CO2 | 1 | 0 | 32 | 73.5 | 0 | 0.89 | NS |


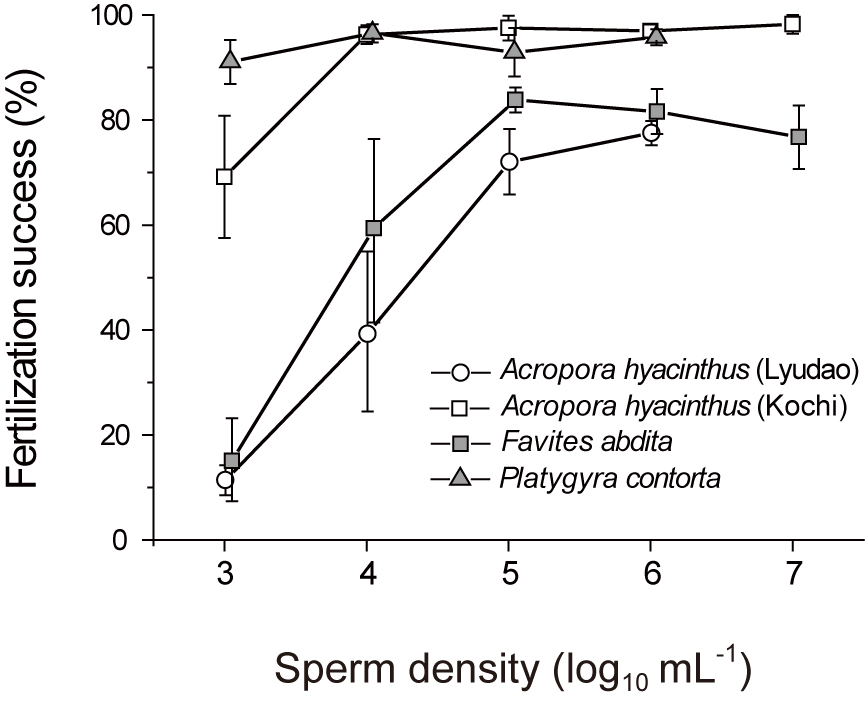


**Figure S1.** The effect of sperm density on the fertilization success of *A. hyacinthus (*Lyudao), *F. abdita*, *A. hyacinthus* (Kochi) and *p. contorta*. Average ±95% confidence intervals are shown (*n* = 4–6).

© 2015 by the authors; licensee MDPI, Basel, Switzerland. This article is an open access article distributed under the terms and conditions of the Creative Commons Attribution license (http://creativecommons.org/licenses/by/4.0/).
